# Supplementary figures and images for: Targeting of colorectal cancer organoids with zoledronic acid conjugated to the anti-EGFR antibody cetuximab
Source: HighWire-hosted journal article supplement (doi:10.1136/jitc-2022-005660), 2022-12-01

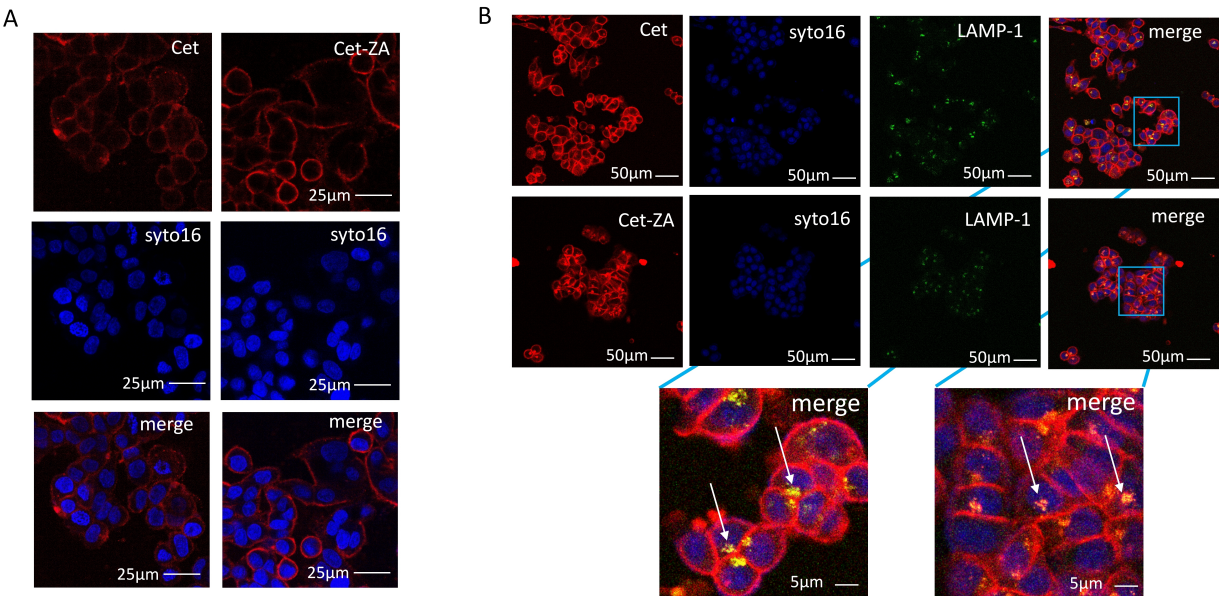

Suppl. Figure 2

Supplement: jitc-2022-005660supp005_data_supplement.pdf [file jitc-2022-005660supp005_data_supplement.pdf]

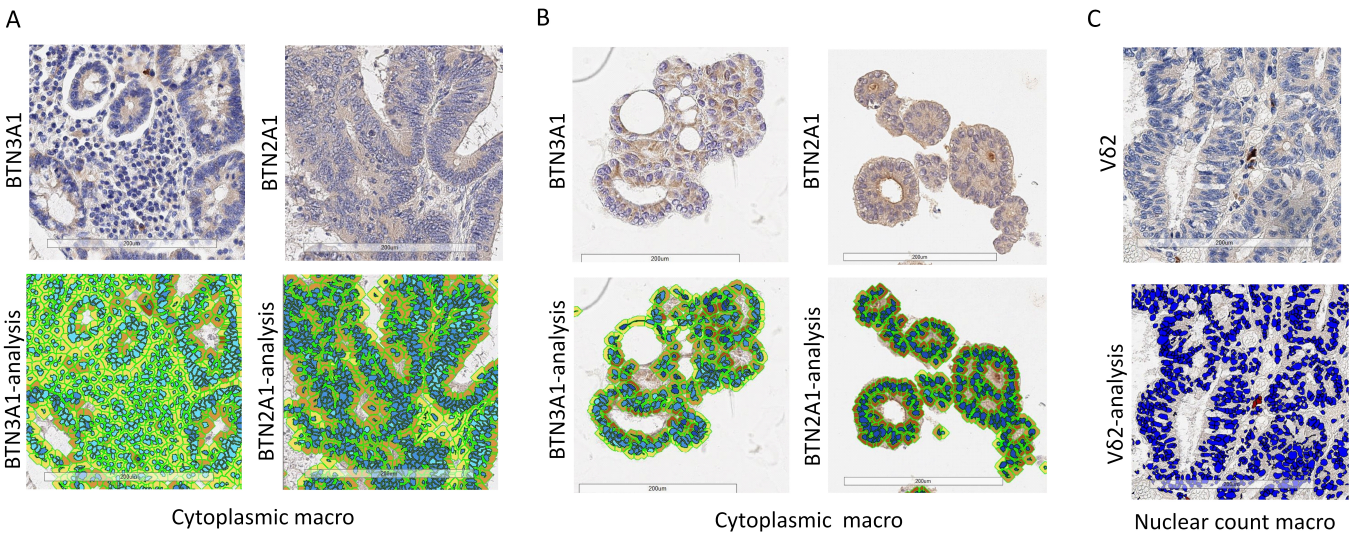

Suppl.Fig.4

Supplement: jitc-2022-005660supp007_data_supplement.pdf [file jitc-2022-005660supp007_data_supplement.pdf]
